# Supplementary material for: Prevalence, Disability, and Management Patterns of Migraine in Korea: Nationwide Survey Data from 2009 and 2018
Source: PubMed Central journal article supplement — J Clin Neurol. 2021 Jan 7;17(1):77–85. doi: 10.3988/jcn.2021.17.1.77 (PMC7840323; doi:10.3988/jcn.2021.17.1.77), 2021-01-07
Supplement: jcn-17-77-s001.pdf [file jcn-17-77-s001.pdf]

**Supplementary Table 1.** Sociodemographic distributions of survey participants, the total Korean population, and cases identified as migraine in the 2009 Korean Headache Survey and the 2018 Korean Sleep-Headache Survey

|                                       | Survey participants | Total population  | <i>p</i> | Migraine       |
|---------------------------------------|---------------------|-------------------|----------|----------------|
| The 2009 Korean Headache Survey       |                     |                   |          |                |
| Sex                                   |                     |                   | 0.910    |                |
| Male                                  | 755 (49.4)          | 16,970,023 (50.2) |          | 3.2 [2.0–4.5]  |
| Female                                | 752 (50.6)          | 16,860,031 (49.8) |          | 8.7 [6.7–10.8] |
| Age, years                            |                     |                   | 0.998    |                |
| 19–29                                 | 241 (22.8)          | 7,271,548 (21.5)  |          | 5.9 [3.3–8.3]  |
| 30–39                                 | 340 (23.5)          | 7,794,495 (23.0)  |          | 6.1 [3.6–8.6]  |
| 40–49                                 | 418 (23.0)          | 8,204,781 (24.3)  |          | 7.4 [4.6–10.1] |
| 50–59                                 | 324 (19.8)          | 6,564,826 (19.4)  |          | 6.1 [4.4–8.8]  |
| 60–69                                 | 184 (10.8)          | 3,994,404 (11.8)  |          | 3.1 [0.0–5.8]  |
| Education level                       |                     |                   | 0.817    |                |
| Middle school or lower                | 240 (15.9)          | 6,427,710 (19.0)  |          | 7.6 [3.5–9.9]  |
| High school                           | 712 (47.2)          | 14,817,564 (43.8) |          | 5.8 [4.3–7.8]  |
| College or higher                     | 555 (36.8)          | 12,584,780 (37.2) |          | 5.7 [3.8–7.7]  |
| Total                                 | 1,507               | 33,830,054        |          | 6.0 [4.8–7.2]  |
| The 2018 Korean Sleep-Headache Survey |                     |                   |          |                |
| Sex                                   |                     |                   | 0.857    |                |
| Male                                  | 1,120 (49.7)        | 19,196,912 (51.0) |          | 4.0 [2.9–5.1]  |
| Female                                | 1,080 (50.3)        | 18,406,170 (49.0) |          | 6.0 [4.7–7.3]  |
| Age, years                            |                     |                   | 0.991    |                |
| 19–29                                 | 434 (19.7)          | 7,566,946 (20.1)  |          | 5.8 [2.7–8.9]  |
| 30–39                                 | 425 (19.3)          | 7,518,454 (20.0)  |          | 4.0 [1.9–6.2]  |
| 40–49                                 | 498 (22.6)          | 8,570,005 (22.8)  |          | 4.8 [2.9–6.7]  |
| 50–59                                 | 498 (22.6)          | 8,380,783 (22.3)  |          | 4.6 [2.8–6.5]  |
| 60–69                                 | 345 (15.7)          | 5,566,894 (14.8)  |          | 4.3 [2.2–6.5]  |
| Education level                       |                     |                   | 0.161    |                |
| Middle school or lower                | 175 (8.0)           | 5,077,642 (13.7)  |          | 4.1 [2.1–6.0]  |
| High school                           | 991 (45.0)          | 12,304,943 (33.2) |          | 4.9 [4.0–6.2]  |
| College or higher                     | 1,034 (47.0)        | 19,680,497 (53.1) |          | 5.5 [4.1–6.8]  |
| Total                                 | 2,200               | 37,603,082        |          | 5.2 [4.1–5.9]  |

Data are *n* (%) or percentage [95% confidence interval] values.
